# Supplementary material for: The Appropriateness of Footwear in Diabetic Patients Observed during a Podiatric Examination: A Prospective Observational Study
Source: MDPI journal article supplement (doi:10.3390/jcm13082402), 2024-04-20

## Supplementary Materials

### Supplementary S1. Data Collection Sheet

#### DATA COLLECTION SHEET FOOTWEAR OBSERVATIONAL STUDY

DATE \_\_\_\_\_

CENTER ID \_\_\_\_\_ DATE OF BIRTH \_\_\_\_\_ PATIENT INITIALS \_\_\_\_\_

SEX ☐ M ☐ F YEARS OF DIABETES \_\_\_\_\_ INSULIN THERAPY ☐ YES ☐ NO

EDUCATION LEVEL: ☐ LOW ☐ MIDDLE ☐ HIGH

SENT BY: ☐ ENDOCRINOLOGIST/DIABETOLOGIST

☐ GENERAL MEDICAL DOCTOR ☐ OTHER

MONOFILAMENT TEST: RIGHT ☐ PRESENT ☐ ABSENT

LEFT ☐ PRESENT ☐ ABSENT

PULSE PALPATION TEST: RIGHT ☐ PRESENT ☐ ABSENT

PEDIDIUM LEFT ☐ PRESENT ☐ ABSENT

PULSE PALPATION TEST: RIGHT ☐ PRESENT ☐ ABSENT

POSTERIOR TIBIAL LEFT ☐ PRESENT ☐ ABSENT

DEFORMITY: ☐ PRESENT ☐ ABSENT

PREVIOUS ULCERATION/AMPUTATION: ☐ RIGHT ☐ LEFT

IF YES, SPECIFY THE LOCATION \_\_\_\_\_

ACTIVE ULCERATION: ☐ RIGHT ☐ LEFT

PREVIOUS CHARCOT: ☐ RIGHT ☐ LEFT

RISK CLASS: ☐ 0 ☐ 1 ☐ 2 ☐ 3

#### FOOTWEAR WORN AT THE TIME OF VISIT

Open Slippers ☐ Sandals ☐ Flip-flops ☐

Closed Décolleté ☐ Moccasins ☐ Classic ☐ Sneakers ☐

Boots/Ankle boots ☐

Gymnastic ☐

Therapeutic ☐

Injury brace ☐

Other ☐

#### OTHER CHARACTERISTICS

DESIGNED FOR INSOLES ☐

HEEL > 4 CM ☐

WRONG SIZE AND/OR FIT ☐

INTERNAL SEAMS ☐

PRESENCE OF SOCKS ☐

FLEXIBLE SOLE ☐

SEMI-RIGID BIOMECHANICAL SOLE ☐

RIGID BIOMECHANICAL SOLE ☐

ROCKING SOLE ☐

TERMOFORMABLE/SELF-MODELING UPPER ☐

ELASTIC UPPER ☐

RIGID UPPER ☐

OTHER ☐

#### FOOT ORTHOSIS

ORTHOSIS CLASSIFICATION: ☐ Custom-made ☐ Preformed ☐ Insoles

RECOMMENDED BY: ☐ Endocrinologist/Diabetologist ☐ Podiatrist

☐ Physiatrist ☐ Orthopedic Technician

☐ Orthopedist ☐ Other: \_\_\_\_\_

## POOR HYGIENE

|                   |                          |
|-------------------|--------------------------|
| External footwear | <input type="checkbox"/> |
| Internal footwear | <input type="checkbox"/> |
| Socks             | <input type="checkbox"/> |
| Feet              | <input type="checkbox"/> |

## QUESTIONNAIRE

(See Table 1 main test)

### Supplementary S2. Legend

#### LEGEND FOR THE FORM COMPILATION OF FOOTWEAR OBSERVATIONAL PROTOCOL

##### Education Level:

Low: primary and secondary schools (elementary and middle schools);

Middle: secondary schools (high schools);

High: Bachelor's degree.

Pulse palpation test:

Palpate the pedidum pulse and posterior tibial bilaterally,

N.E. (not executable) if there is peri-malleolar and/or dorsal edema that prevents palpation

The item "PRESENCE OF ULCER" should be left blank if ABSENT.

Monofilament test:

- The test should take place in a quiet, relaxed place.
- First apply the monofilament to the patient's hands (or elbow or forehead), so that the patient knows what to expect.
- The patient must not see if the filament is applied.
- There are at least 3 points to test on both feet: big toe, base of the 1st and 5th metatarsals.
- Apply the monofilament perpendicular to the skin surface.
- Apply enough force for the monofilament to flex.
- The total duration of the test, from the moment the monofilament comes into contact with the skin to when you remove it, should be approximately two seconds.
- In the presence of an ulcer, callus or scar, DO NOT apply the filament above, but near the interested area.
- Do not slip the filament on the skin and avoid repeated contact with the area on which the test is carried out.
- Press the filament against the skin and ask the patient if they feel pressure (yes/no) and then where they feel it.
- Repeat the procedure twice at the same point, and alternate it with one simulation, during which the filament is not applied (in total three questions per point).
- Protective sensation is present at each point if the patient responds correctly in two out of three applications.
- The protective sensation is absent with two out of three incorrect answers and the patient must therefore be considered at risk of ulceration.
- Encourage the patient during the test.

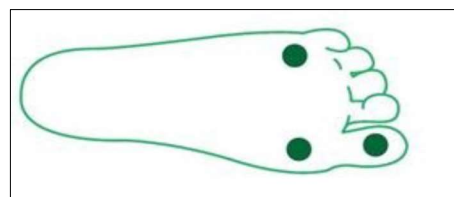

Suspected Risk Class:

0: no complications;

1: neuropathy;

2: neuropathy + vasculopathy and/or deformity;

3: neuropathy + vasculopathy and/or deformity, previous ulceration/amputation and/or previous Charcot.

## Footwear

### FOOTWEAR WORN AT THE TIME OF VISIT

|                        |                                                                                                                                                                                                                                                                                                                                                                                                                                                                                                                                                                                                                                                                                                                                                                                     |
|------------------------|-------------------------------------------------------------------------------------------------------------------------------------------------------------------------------------------------------------------------------------------------------------------------------------------------------------------------------------------------------------------------------------------------------------------------------------------------------------------------------------------------------------------------------------------------------------------------------------------------------------------------------------------------------------------------------------------------------------------------------------------------------------------------------------|
| OPEN<br>(See photos)   | Slippers: off-the-shelf, WITHOUT back buckle, open or closed on the toes.<br>Examples: rubber swimming slippers, with double and crossed buckles, Crocs, cloth house slippers, leather slippers, terry slippers.<br>* Exceptions include: cloth slipper with zipper, closed on the toes and back.<br>Sandals: off-the-shelf, WITH back buckle, open or closed on the toes.<br>Examples: Birkenstock, in leather or rubber or other material, elegant or sporty.<br>Flip-flops: off-the-shelf, Havaianas and similar, sporty and elegant.                                                                                                                                                                                                                                            |
| CLOSED<br>(See photos) | Décolleté: off-the-shelf, closed or open toe and back. Examples: ballerina footwear, elegant pointed shoe.<br>Moccasins: off-the-shelf, classic for men or women, low uppers on toes, with rubber sole or other materials. Example: boat footwear.<br>Classic: off-the-shelf, classic men's or women's shoe in leather or other material with a low fit, more or less elegant. Example: Parisian footwear.<br>Sneakers: off-the-shelf, any model not included in the other categories, casual, more or less elegant or sporty footwear but not suitable for gymnastic activities. Examples: Camper, Converse All Star, low at the ankle.<br>Boots/Ankle boots: off-the-shelf, with high ankle length. Examples: Timberlands, ankle boots, rain boots, Converse All Star high ankle. |
| GYMNASTIC              | Off-the-shelf models for SPORTS activities: running, jogging, trekking.                                                                                                                                                                                                                                                                                                                                                                                                                                                                                                                                                                                                                                                                                                             |
| THERAPEUTIC            | Preventive suitable footwear, custom-made footwear built by orthopedic technician, specialized.                                                                                                                                                                                                                                                                                                                                                                                                                                                                                                                                                                                                                                                                                     |
| INJURY BRACE           | Temporary footwear/braces for active injuries and bandages.<br>Examples: Optima, Teradiab, Talus, Teraheel.                                                                                                                                                                                                                                                                                                                                                                                                                                                                                                                                                                                                                                                                         |
| OTHER                  | Report only in case of real impossibility of assigning the footwear to previous classes.                                                                                                                                                                                                                                                                                                                                                                                                                                                                                                                                                                                                                                                                                            |

### Other Characteristics

|                                                                                                                 |                                                                                                                                                                                                                 |
|-----------------------------------------------------------------------------------------------------------------|-----------------------------------------------------------------------------------------------------------------------------------------------------------------------------------------------------------------|
| Custom-made insole                                                                                              | This category includes preventive/TF and any open/closed shoe with a removable and replaceable custom-made insole.                                                                                              |
| Wrong size and/or fit                                                                                           | Report both too long and too short sizes (put the finger between the back of foot and the footwear, evaluating the space) and wrong fit (with a tape measure, the fit of the shoe and the metatarsal diameter). |
| Heels > 4 cm                                                                                                    | Report only if higher than 4 cm.                                                                                                                                                                                |
| Flexible sole                                                                                                   | Normal sole, totally flexible at the level of the metatarsals.                                                                                                                                                  |
| Biomechanical sole semi-rigid                                                                                   | Sole that resists flexion partially during the propulsion phase of the step and bends slightly.                                                                                                                 |
| Rigid biomechanical sole                                                                                        | Sole that totally resists bending during the propulsion phase and does not bend at all.                                                                                                                         |
| Rocking sole                                                                                                    | Sole with early rolling point, i.e., before the metatarsal heads.                                                                                                                                               |
| Rigid upper                                                                                                     | Rigid materials.                                                                                                                                                                                                |
| Internal seams                                                                                                  | Not to be confused with the external ones: put your hands inside the footwear and personally check.                                                                                                             |
| Presence of socks:                                                                                              | Valid: cotton, wool, sponge, microfiber, plant materials.                                                                                                                                                       |
| Type                                                                                                            | Invalid: nylon.                                                                                                                                                                                                 |
| Other: Report any characteristic that does not belong to the previous ones and which may be risk of ulceration. |                                                                                                                                                                                                                 |

### Foot orthoses:

Custom-made: thermoformable foot orthoses, or plaster cast from phenolic foam or plaster bandage, leavened, cad-cam and similar.

Preformed: semi-finished, already assembled, ready

(e.g., gel insoles, carbon insoles, standard insoles present inside the footwear).

Insoles: insoles purchased by the patient himself in healthcare shop, pharmacies or elsewhere.

Recommended by: recommended and/or prescribed through the SSN (National Health System).

Poor hygiene:

Report any presence of dirt, dust, hair of animals, hair, blood stains or other things present inside and outside the shoe, with the exception of the outer sole.

Questionnaire:

Ask the questions exactly as they are shown on the questionnaire so as not to influence the patient's response.

Question 9: Briefly note which advice patients remembers, without suggestions or indications and only those relating to footwear, not to foot.

### Supplementary S3. Footwear Legend

Sample of images

SLIPPERS

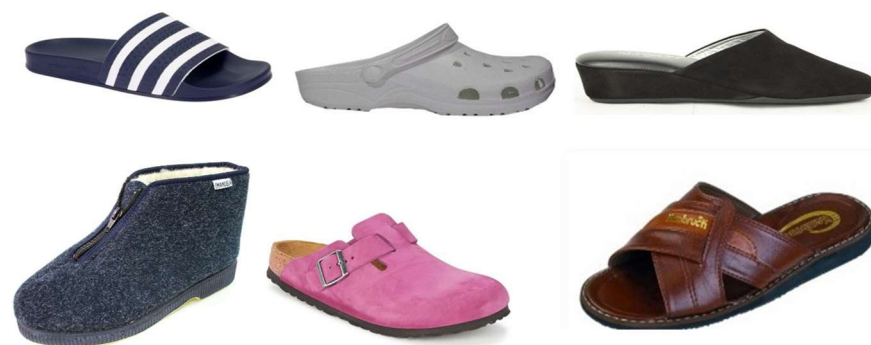

SANDALS

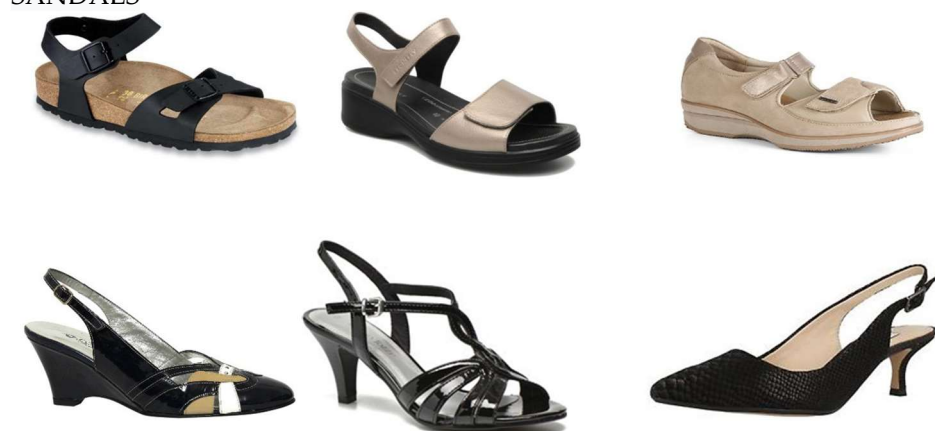

FLIP-FLOPS

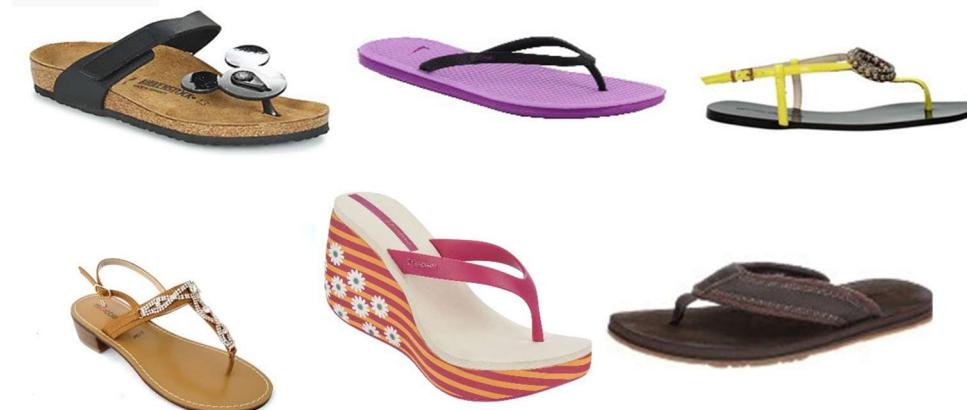

DE'COLLETE'

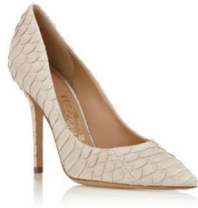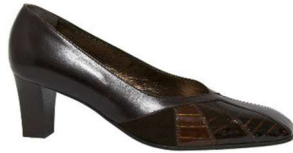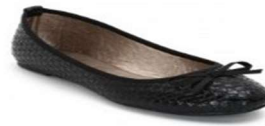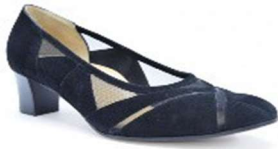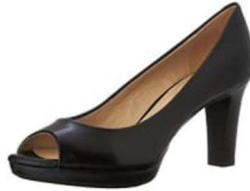

## MOCCASINS

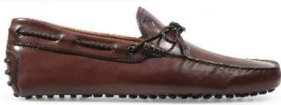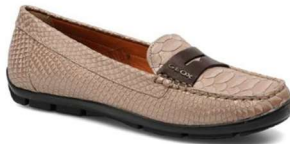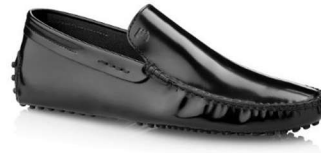

## CLASSIC FOOTWEAR

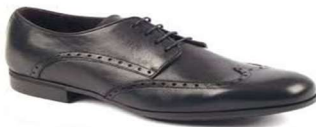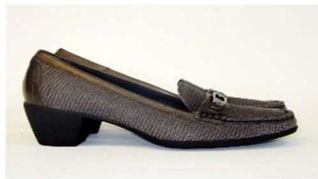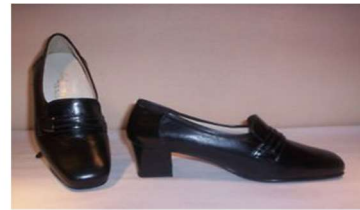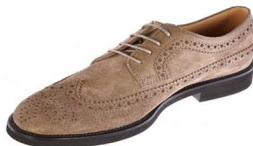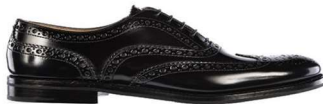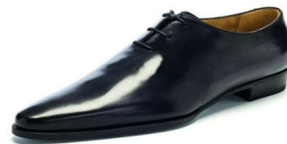

## SNEAKERS

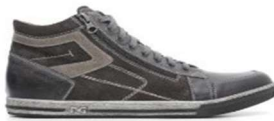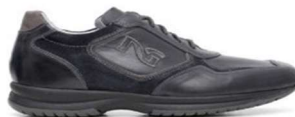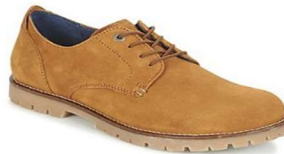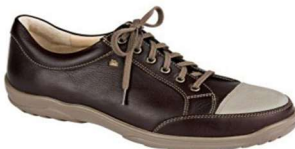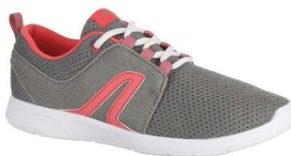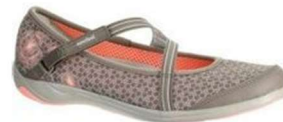

## BOOTS



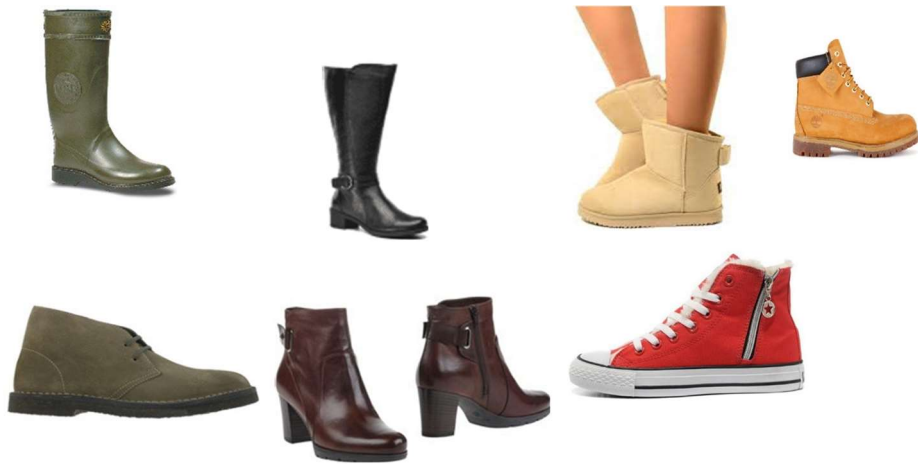

#### GYMNASTIC FOOTWEAR

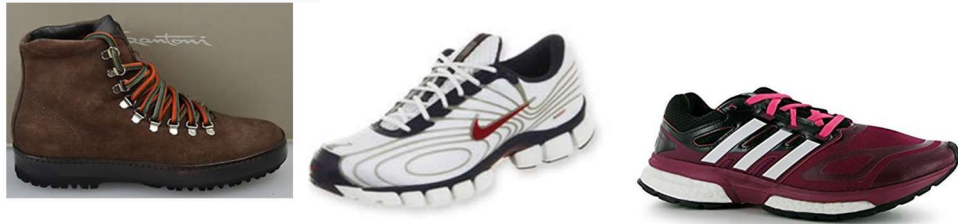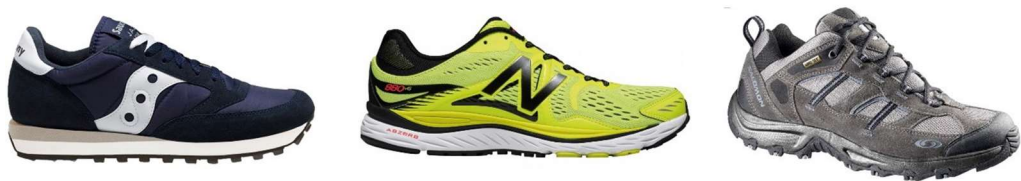

#### INJURY BRACE

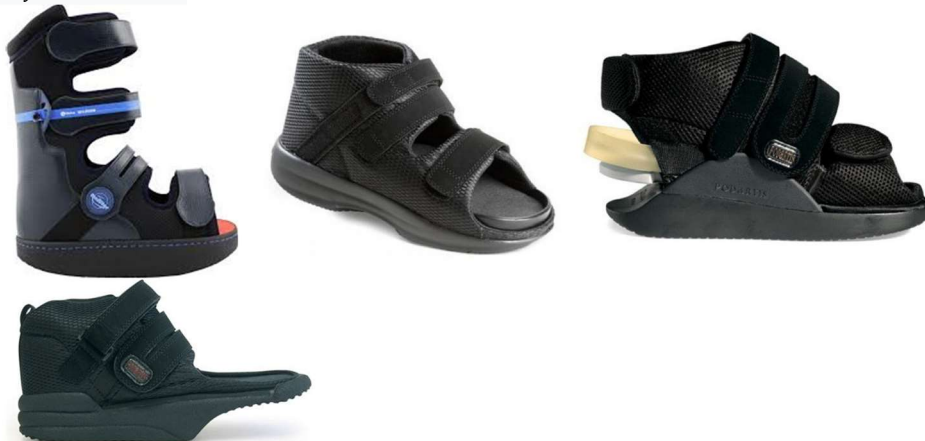

#### THERAPEUTIC FOOTWEAR

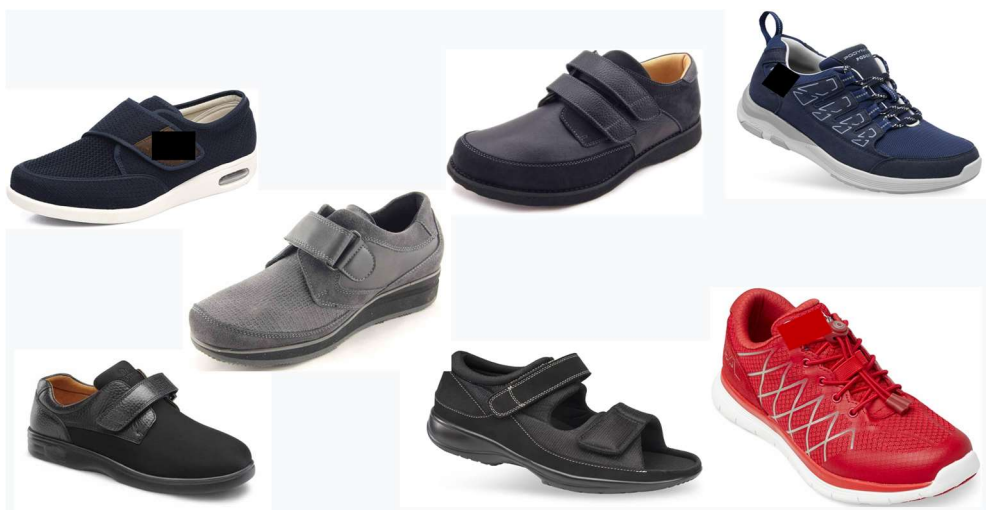

Supplement: s1 [file s1]
